# Supplementary material for: Nobiletin as a Neuroprotectant against NMDA Receptors: An In Silico Approach
Source: MDPI journal article supplement (doi:10.3390/pharmaceutics14061123), 2022-05-25
Supplement: s1 [file s1]

**Table S1.** The analysis of NMDA proteins and their isoforms.

| Name                      | Molecular Weights | GRAVY index | Instability index | Aliphatic index |
|---------------------------|-------------------|-------------|-------------------|-----------------|
| GRIN2A isoform 1 (GLUN2A) | 165282.52         | -0.393      | 42.26             | 76.73           |
| GRIN2B (GLUN2B)           | 166367.24         | -0.388      | 48.76             | 74.55           |
| GRIN2C (GLUN2C)           | 134208.94         | -0.060      | 49.19             | 84.16           |
| GRIN2D (GLUN2D)           | 143752.21         | -0.192      | 57.34             | 77.78           |

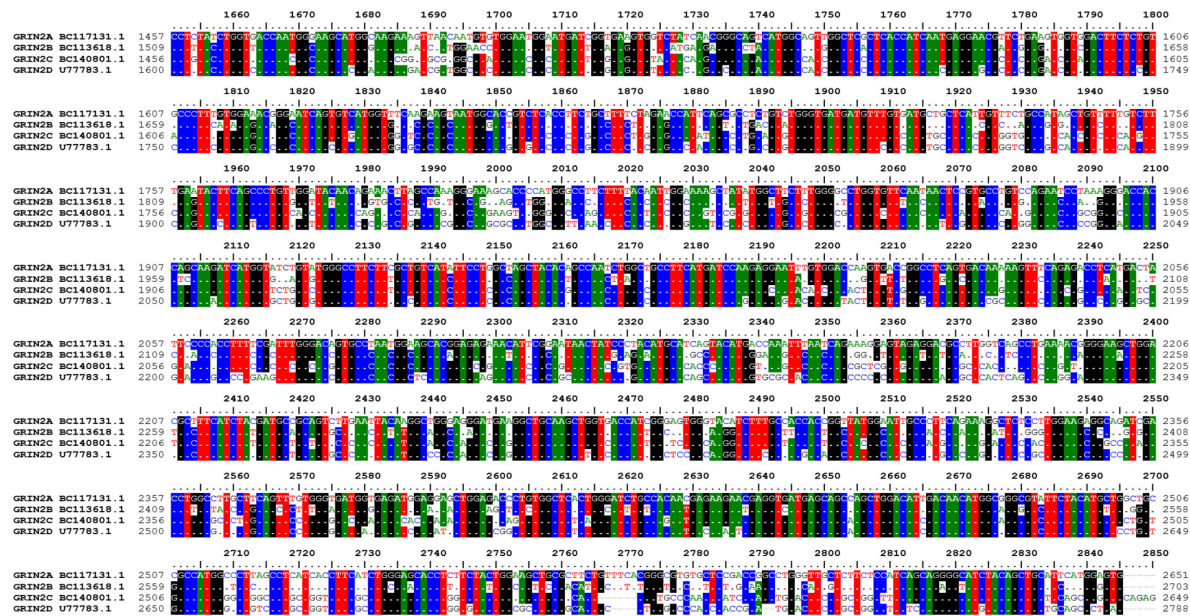

**Figure S1.** Multiple sequence alignment mRNA/coding sequence of GRIN2A, GRIN2B, GRIN2C AND GRIND2D genes.

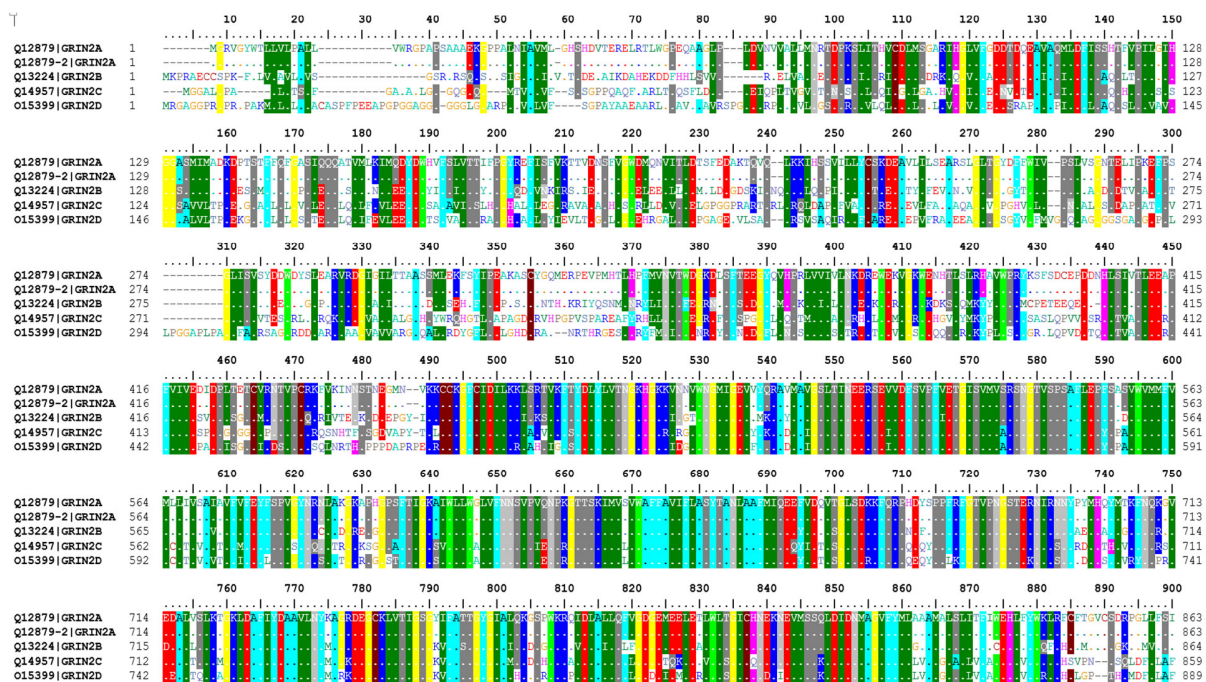

**Figure S2.** Multiple sequence alignment protein sequences are encoded by GRIN2A, GRIN2B, GRIN2C, and GRIN2D genes.

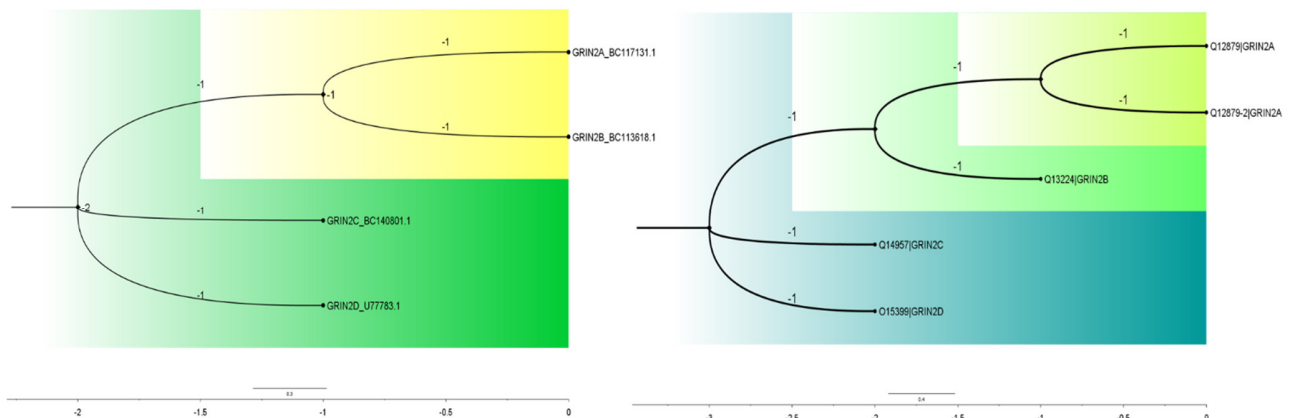

**Figure S3.** Phylogenetics tree created among (a) nucleotide sequence (b) protein sequence.
